# Supplementary material for: Rapid wet chemical synthesis of bioactive glass with high yield by probe sonication
Source: Royal Society of Chemistry journal article supplement (doi:10.1039/d2tb02385g), 2023-01-01
Supplement: d2tb02385g1.pdf [file d2tb02385g1.pdf]

## Supplementary information

For

### Rapid Wet Chemical Synthesis of Bioactive Glass with High Yield by Probe Sonication

Asma Tufail Shah<sup>\*a,b</sup>, Mehvish Zahoor<sup>a,c</sup>, Nawshad Muhammad<sup>d</sup>, Franz Kamutzki<sup>a</sup>, Johannes Schmidt<sup>e</sup>, Oliver Görke<sup>#a</sup>

<sup>a</sup>Fachgebiet Keramische Werkstoffe / Chair of Advanced Ceramic Materials, Institute of Materials Science and Technology, Technische Universität Berlin, 10623 Berlin, Germany.

<sup>b</sup>Interdisciplinary Research Centre in Bimedical Materials, COMSATS University Islamabad Lahore Campus, Defence Road, Off-Raiwand Road Lahore-54000, Pakistan.

<sup>c</sup>Nanobiotechnology Group, National Institute for Biotechnology and Genetic Engineering College, Pakistan Institute of Engineering and Applied Sciences (NIBGE-C, PIEAS), Jhang Road, Faisalabad-38000, Pakistan.

<sup>d</sup>Department of Dental Materials, Institute of Basic Medical Sciences, Khyber Medical University, Peshawar, Pakistan

<sup>e</sup>Institut für Chemie – Funktionsmaterialien, Technische Universität Berlin, 10623 Berlin, Germany

†Dr Asma Tufail Shah

PhD (China), Postdoc (UK), Postdoc (Germany)

Alexander von Humboldt Fellow

Email: [asmashah@campus.tu-berlin.de](mailto:asmashah@campus.tu-berlin.de); [drasmashah@cuilahore.edu.pk](mailto:drasmashah@cuilahore.edu.pk)

#Dr Oliver Goerke

Email: [o.goerke@tu-berlin.de](mailto:o.goerke@tu-berlin.de)

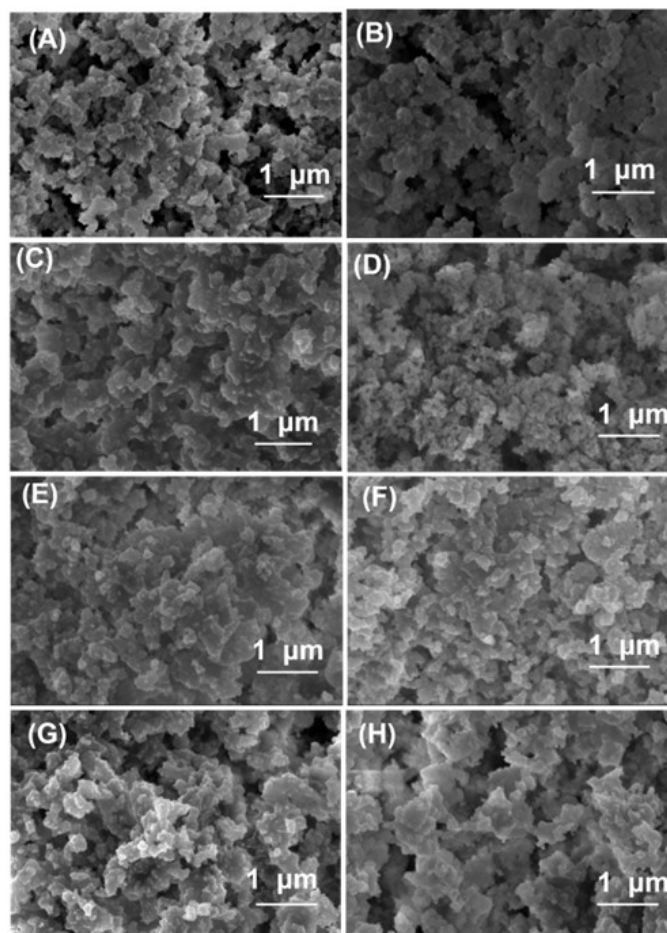

**Figure S1:** SEM analysis (magnification 50k ×) showing the glass powders morphology: (A) BG-36, (B) BG-36@650 °C, (C) BG-37, (D) BG-37@650 °C, (E) BG-35, (F) BG-35@650 °C, (G) BG-33, and (H) BG-33@650 °C.

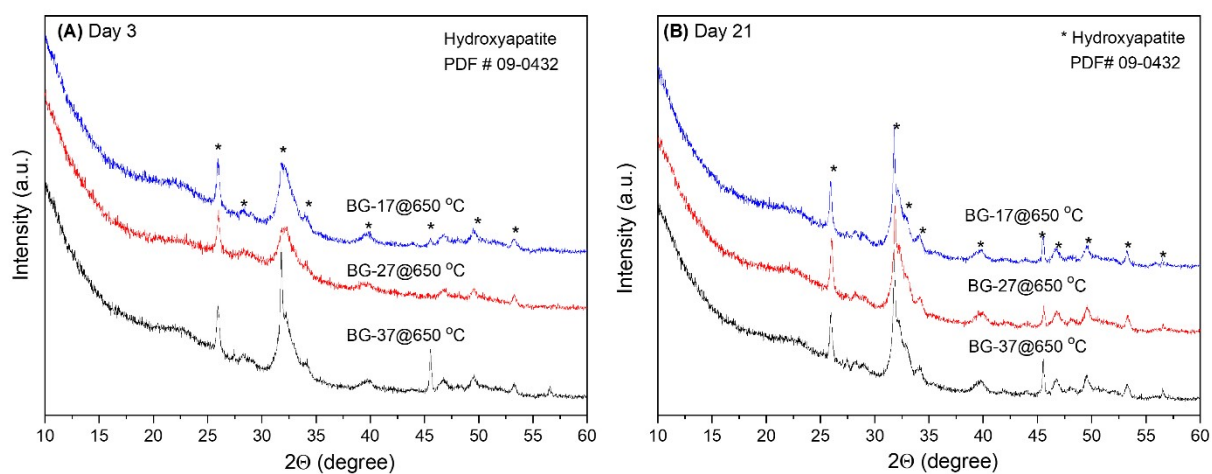

**Figure S2.** XRD patterns of BG samples prepared at 70% amplitude for different irradiation periods after soaking in PBS solution for 3 (A) and 21 (B) days.

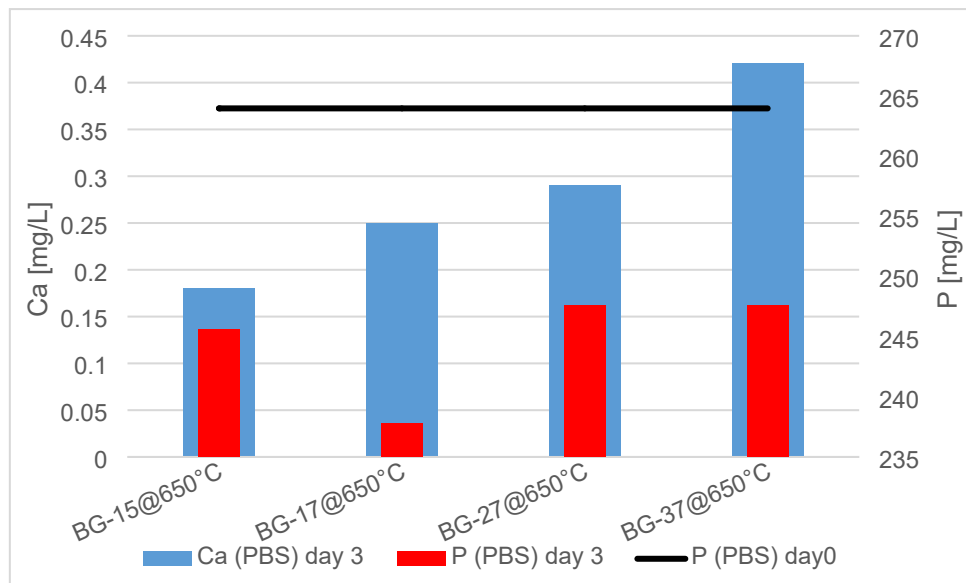

**Figure S3:** The concentrations of calcium and phosphorus ions in PBS solution measured by ICP-OES.
